# Supplementary material for: Effect of body mass index on soft tissues in adolescents with skeletal class I and normal facial height
Source: PeerJ. 2023 Oct 3;11:e16196. doi: 10.7717/peerj.16196 (PMC10557952; doi:10.7717/peerj.16196)
Supplement: Supplemental Information 1 — Group 1: overweight; Group 2: normal weight; Group 3: underweight; Sex 1: male; Sex 2: female; X’: Repeated measurement of X [file peerj-11-16196-s001.xlsx]

## Sheet: Sayfa1
GRUP/GROUP	CİNSİYET/SEX	YAŞ/AGE (year)	BMI (kg/m2)	PERCENTİLE (%)	ANB (°)	ANB' (°)	GoGn-SN (°)	GoGn-SN' (°)	G-G (mm)	G-G' (mm)	N-N (mm)	N-N' (mm)	A-Sn (mm)	A-Sn' (mm)	Ls (mm)	Ls' (mm)	Sto (mm)	Sto' (mm)	Li (mm)	Li' (mm)	B-B (mm)	B-B' (mm)	Pog-Pog (mm)	Pog-Pog' (mm)	Gn-Gn (mm)	Gn-Gn' (mm)	Me-Me (mm)	Me-Me' (mm)	Sn-Sto (mm)	Sn-Sto' (mm)	LLB-LLV (mm)	LLB-LLV' (mm)	Sn-Li (mm)	Sn-Li' (mm)
1	2	9	26.5	86	4	4	29	29	6.94	7.5	5.8	5.07	13.42	14.04	14.44	15.1	7.09	8.2	16.87	17.2	13.63	12.8	11.23	11.73	11.37	10.9	8.88	8.51	17.8	17.2	8.49	8.5	28.6	28.2
1	1	14	24.2	86	4	4	34	32	4.55	5.01	6.72	7.2	17.76	18.2	17.39	18.01	6.71	6.72	18.47	18.67	11.8	12.2	9.73	9.98	7.99	8.34	6.36	6.37	18.3	20.1	12.38	11.2	30.7	33.8
1	2	10	28.7	94	2	2	28	28	7.75	7.47	6.6	7.3	15.6	15.6	15.4	16	6.92	7.5	14.52	15.02	12.01	12.38	14.14	15.2	10.45	10.5	10.02	10.06	10.09	10.5	10.09	11.04	40.8	36.5
1	1	9	18.8	86	3	3	33	34	6.39	6.4	5.3	5.8	12.47	11.87	11.71	10.98	6.25	6.23	12.95	12.75	9.7	9.54	7.97	7.87	7.12	7.02	6.64	6.12	17.6	16.7	10.5	10.2	26.5	26.5
1	2	11	28.3	94	2	1	28	28	5.93	6.43	6.34	6.51	14.17	13.49	15.97	16.17	12.05	11.8	17.06	17.09	11.42	11.18	11.42	11.09	10.08	10.9	8.92	9.7	12.9	13	7.34	6.97	20.6	22
1	1	12	25.1	87	2	2	28	27	6.41	5.63	6.11	5.62	17.84	16.5	14.17	13.96	7.59	6.7	13.53	14.2	10.46	10.54	10.99	11.22	9.78	10.23	8.68	9.07	20.4	19.7	10.45	9.85	32.2	31
1	1	13	24.3	86	4	3	37	36	5.88	5.63	5.44	5.62	17.46	16.5	15.38	14.96	5.58	6.1	14.81	14.83	14.68	13.54	6.45	7	5.08	6.3	5.95	6.7	21.3	20	10.55	10.67	34.3	33.3
1	2	10	26.4	87	3	2	34	35	5.98	6.13	6.65	6.8	14.97	13.87	15.23	16.03	8.34	8.85	13.72	14.37	9.74	9.09	9.91	10.6	8.71	9.5	8.12	8.91	12.3	12	7.85	7.61	21.3	20.6
1	2	14	29	94	3	2	33	32	7.5	8.18	4.35	5.91	14.45	14.92	10.47	11.96	4.54	4.52	10.84	11.5	10.03	10.34	11.66	12.53	10.75	11.9	7.79	8.1	18	18.6	9.01	8.99	28.7	29.3
1	1	15	26.9	90	3	3	36	35	8.71	9.11	5.89	4.79	17.92	16.86	16.34	17.2	9.12	8.9	18.49	18.55	13.79	13.44	9.63	9.1	6.89	6.9	8.25	9.6	21	19.7	13.02	13.54	35.5	34.2
1	1	13	24.2	86	2	2	30	28	6.56	6.74	4.3	4.12	15.67	15.83	14.82	15.2	8.02	8.2	15.06	15.2	9.67	10	9.77	10	7	8.6	5.99	6.4	19	18	11.41	11.19	30.3	31.1
1	2	16	28.4	94	4	4	31	31	6.3	5.98	4.7	4.7	11.06	11.65	13.38	13.4	6.54	6.55	13.8	13.9	11.5	11.2	8.6	7.9	6.59	6.7	6.88	6.9	14.5	15.7	8.91	9.38	26.1	27.1
1	2	9	24	89	3	3	28	29	7.92	8.28	6.38	6.87	15.23	15.25	16.42	16.07	10.02	9.45	19.14	19.83	10.55	11	11.95	11.87	10.9	11	10.01	8.6	18.2	17.8	10.27	10.04	32	31.3
1	2	11	27	88	2	2	30	31	4.28	4.84	5.11	5.44	15.28	16	11.67	11.88	4.46	3.7	11.99	12.3	8.76	9.4	6.67	6.98	6.83	6.66	6.67	7.3	17.7	18	11.37	11.14	30.3	30.8
1	2	10	25.9	87	2	2	32	30	6.68	9.59	5.79	7.38	15.39	18.5	14.61	16.29	7.34	7.5	15.3	14.6	11.15	10	9.97	10.3	8.58	10.42	7.85	10.2	17.54	25.1	10.25	11.7	30.3	38.8
1	1	11	25.8	87	3	4	33	32	6.1	4.1	5.75	4.9	15.38	15.69	14.7	12.96	7.4	6.9	15.4	14.25	11.3	9.6	9.2	9.65	9.5	8.93	6.7	7.62	17.4	14.4	10.3	8.5	32.2	27
1	1	9	26.2	88	2	4	30	31	5.68	4.73	5.6	4.57	15.4	16.7	13.5	14.9	6.8	6.8	15	16.4	11.1	11.72	10.5	10.8	7.5	8.51	8.7	8.1	13.7	18.6	9.9	10.35	28.3	29
1	2	11	27	89	4	5	31	31	6.68	5.43	4.3	7.33	14	16.2	15.5	17.05	8	10.01	14.4	16.5	10.8	10.4	9.9	8.4	9.68	7.6	7.86	7.37	21.3	18.9	11.3	8.01	34	28.2
1	1	10	24	86	3	4	32	29	7.68	6.31	6.65	7.86	15.8	12.9	14	11.2	6.2	4.91	16.2	15	11.1	11.69	10.7	8.77	7.6	8.11	7.4	7.9	17.5	15.8	9.2	9.56	26.1	27
1	1	13	25.7	87	4	1	29	32	5.93	4.69	5.89	5.49	14.17	13.92	13.8	14.2	6.9	4.92	17.3	13.8	13.2	9.4	8.8	6.9	10.2	5.3	8.12	5.45	17.4	17.3	11	8.96	30.4	29.5
1	1	14	25.8	87	2	1	35	31	8.71	4.56	5.44	6.21	14.97	14.99	15.2	12.99	7.3	6.5	13.3	13.61	9.7	10.63	10.7	7.91	6.5	7.2	7.3	6.15	16.4	18.7	10.25	9.21	30	30.4
1	2	12	26.2	87	2	4	30	36	6.65	5.23	4.35	7.35	15.67	18.31	14.6	11.96	7.2	6.8	15.4	13.97	11.15	9.71	8.6	7.79	8.6	7.7	7.8	7.2	18	18.8	10.24	12.58	30.3	33.3
1	2	11	27	88	4	4	34	35	6.3	6.39	5.89	6.8	15.28	15	14.5	11.06	7.4	4.43	15.4	14	11	14.56	9.97	7.33	8.5	6.61	8.1	6.81	17.3	19.9	11.3	9.74	30.5	33.5
1	1	12	27.7	90	2	4	30	31	9.13	5.73	7.27	7.75	17.6	13.82	16.41	15	6.99	3	14.66	11.74	9.56	10.56	9.55	9.5	10.06	8	9.66	8.5	24.1	18	12.24	9.41	38.8	31.3
2	1	13	20	40	3	4	32	34	4.82	5.94	5.48	8.41	15.05	13.24	12.71	15.29	7.65	5.98	14.44	15.26	10.01	11.14	9.4	8.3	8.9	7.5	8.06	5.76	15.5	19.8	8.89	10.3	25.2	29.5
2	1	15	18.7	29	4	3	30	37	5.74	4.45	4.22	4.59	17.05	17.49	15.89	12.67	7.71	7.8	15.91	14.07	11.31	9.8	10.11	8.8	8.97	7.29	7.68	7.11	17.9	15.8	9.28	9.62	28.5	27
2	1	14	19.6	56	4	4	30	30	5.37	5.6	6.76	8.2	15.42	13.67	17.33	10.2	9.12	3.8	16.33	14	10.12	13.5	7.76	9.8	6.52	7.7	6.72	8.1	17.1	15.2	8.38	11.06	27.8	29.5
2	2	14	19.1	45	4	4	28	29	6.39	5.87	7.04	6.31	12.39	14.1	10.78	10.9	5.71	2.8	14.05	13.5	11.91	9.97	8.91	8.7	8.13	6.5	8.76	6.3	16.7	18.9	10.13	8.14	28.1	30.5
2	2	15	22.5	75	1	3	32	36	4.35	7.1	5.78	5.7	13.81	15.5	13.57	13	5.1	5.1	13.32	13.32	9.1	9.7	7.19	10.2	5.28	7.6	5.32	6.99	17.3	17.7	8.96	11.49	29.8	29.7
2	2	10	18.7	22	2	3	31	34	4.96	5.93	6.18	3.99	15.38	16.44	13.38	15.28	7.34	9.18	14.11	15.81	10.52	12.5	8.33	10.9	7.27	10.65	6.72	8.12	18.5	16.9	9.58	10.41	29.3	28.8
2	1	9	21.6	56	4	4	36	35	5.5	5.2	7.61	5	18.45	13	12.09	11.67	7.07	3.4	14.46	12.7	10.39	9.66	8.9	5.78	7.08	4.73	6.73	4.9	19.6	19.5	12.56	11.65	32.6	30
2	1	9	19.6	48	4	3	37	36	6.71	5.88	7.62	6.49	14.09	14.49	11.28	11.49	4.64	3.33	13.94	12.48	14.61	10.6	7.04	7.1	5.7	6.8	6.18	7.34	21.7	16.4	10.43	9	34.2	28.2
2	2	10	22.8	71	4	4	31	35	5.33	5.06	7.4	5.12	13.8	14.38	8.36	10	4.06	6.2	11.19	13.58	10.49	11.91	9.94	7.8	8.82	6.5	8.52	7	17.6	20.1	9.41	9.34	31.8	34.2
2	1	11	19.3	13	4	4	34	31	5.84	5.47	8.38	5.82	13.01	13.2	15.42	12.49	5.63	5.4	16.39	15.7	12.8	12.13	7.36	7.64	7.32	6.3	5.71	5.79	21.1	15.7	9.83	8.82	32.4	24.8
2	2	12	18.8	35	2	4	37	35	4	3.67	5.14	3.2	12.72	14.5	13.88	11.7	8.86	2.39	14.45	12.91	10.13	11.34	9.13	6.5	8.3	8.29	7.11	4.29	15.7	17.3	9.12	9.07	26.8	27.9
2	1	13	20.1	21	4	3	30	33	4.91	4.45	7.04	4.73	13.65	15	9.34	10	4.97	3.69	13.79	13.42	13.12	10.09	9.75	6.04	7.72	6.49	7.93	4.43	15.2	18.2	11.06	10.7	29.7	28.7
2	2	10	17.9	19	4	3	29	29	5.57	4.98	5.45	4.8	13.47	15.23	10.33	14.2	3.47	7.6	12.72	15.6	9.13	10.2	9.11	6.8	7.77	6.4	6.14	5.8	17.4	19	8.02	7.56	29.1	28.9
2	2	11	23.4	73	3	3	36	30	7.25	7.1	5.73	4.71	15.82	18.13	12.85	15.38	5.47	8.02	13.45	15.36	10.96	11.16	10.47	8.6	8.32	8.8	6.83	6.7	17.7	17.3	11	11.18	30.1	26.1
2	1	9	20	40	3	4	32	33	5.48	5.7	6.27	5.7	14.63	15.26	12.75	12.96	6.34	4.29	14.27	14.76	11.04	9.7	8.95	7.46	7.75	5.54	7.07	5.8	17.72	19.9	9.77	11.28	32.6	33.6
2	2	14	18.7	29	2	2	31	31	5.49	3.84	6.76	4.19	12.72	13.69	10.78	8.69	5.71	4.85	13.94	11.55	10.49	8.4	7.04	7.72	5.7	7.97	6.72	7.42	17.6	16	10.43	8.24	34.2	23.8
2	2	10	19.6	56	4	2	33	32	5.74	5.46	5.6	4.01	13.65	11.97	13.57	11.5	5.1	4.4	11.19	14.7	12.8	9.8	9.94	9.89	8.82	7.6	6.73	6.8	21.1	18.3	9.41	11.23	31.8	33.4
2	1	9	19.1	45	4	2	34	31	4.35	6.2	4.3	6.1	13.47	18.6	13.38	2023-07-12	7.34	2.5	16.39	13.5	10.13	10.4	7.36	7.1	7.32	6.5	6.18	5.8	15.7	17.4	9.83	7.88	31	32.01
2	1	11	22.8	71	2	2	30	28	6.36	5.1	6.65	5.41	15.82	12.01	12.09	10.75	7.07	4.38	14.45	15.21	13.12	7.8	9.13	9.1	8.3	7.1	8.52	5.7	15.2	18.3	9.12	8.15	26.8	28.4
2	1	12	19.3	13	3	2	32	33	5.45	4.5	5.89	5.1	14.09	16.7	11.28	13.2	4.64	4.5	13.79	11.5	9.13	10.4	9.75	9.1	7.72	8.44	5.71	7.73	17.4	19.5	11.06	9.53	29.7	30.1
2	2	13	18.8	35	3	3	31	29	5.3	5.41	5.44	6.38	15.42	16.56	12.6	12.44	4.06	6.8	12.72	12.7	10.96	10.5	9.11	6.45	7.77	5.56	7.11	5.4	17.7	16.4	8.02	10.3	29.1	27.5
2	2	10	20.1	21	2	1	33	33	5.4	5.3	4.35	4.35	16.2	16.2	12.6	12.1	5.63	5.63	13.45	15.2	11.5	13.5	7.19	10.2	8.32	10.65	7.93	7	17.7	19.5	9.7	9.21	30.1	28.2
2	1	11	17.9	19	4	4	32	31	6	6	5.89	5.9	14.63	14.63	11	11	6.34	6.44	14.27	16.67	11.3	9.97	7.76	10.9	7.5	6.73	6.14	5.79	17.6	16.4	9.6	11.58	30.1	27
2	2	12	16.9	28	3	4	34	33	5.46	5.46	4.23	4.23	15.44	15.44	14.14	14.14	8.41	9.41	15.63	15.02	11.04	9.7	10.97	10.78	10.21	6.8	6.83	5.29	16.9	20.1	9.91	9.74	29.2	29.5
3	2	11	14.5	<5	4	4	35	34	4.82	4.82	4.68	4.68	12.21	12.21	10.36	10.36	2.26	2.3	11.98	12.75	9.47	10.5	5.39	7.1	4.8	6.5	4.23	4.43	16	15.7	6.8	9.41	29.5	30.4
3	1	13	15.2	<5	4	4	36	35	5.49	5.49	6.47	6.57	14.73	14.73	12.55	12.55	4.49	4.49	13.03	15.09	11.67	9.66	7.14	7.8	6.97	6.3	7.27	6.8	16.9	17.3	9.02	10.3	25.7	33.3
3	1	14	16.7	<5	4	3	35	35	4.67	4.57	5.08	5.08	17.2	17.2	11.8	11.8	5.87	4	15.2	14.2	11.09	10.6	6.29	7.64	5.9	8.29	6.13	6.7	20.6	18.2	10.13	9.62	34.9	33.5
3	2	16	17.1	<5	4	4	32	32	5.31	5.31	5.45	5.45	13.16	13.16	12.22	12.22	6.07	6.07	14.11	14.83	11.13	11.91	6.97	6.5	6.71	6.49	5.88	5.8	15.6	17	9.32	11.06	24.6	27.3
3	2	13	14.7	<5	4	4	36	35	4.13	4.16	3.12	3.3	15.64	15.64	10.27	10.27	3.75	3475	12.4	12.37	11.29	12.13	5.8	6.04	4.7	6.4	4.74	7.42	17.1	17.3	8.85	8.14	27.8	29.5
3	2	12	16.9	<5	3	3	34	33	5.52	5.52	4.48	4.48	17.08	17.08	13.13	14	4.87	4.87	13.55	11.5	10.13	11.34	6.76	6.8	5.3	8.8	4.36	5.8	17.5	19.9	8.76	11.49	28.1	27
3	1	9	17.5	<5	4	3	30	30	5.04	5.04	5.9	5.9	17.36	17.36	15.37	15.37	8.6	7.8	16.23	18.55	11.11	10.09	7.9	8.6	7.13	5.54	6.76	5.8	19.2	17	7.32	10.41	29.2	29.5
3	1	9	17.4	<5	4	4	30	30	6.61	6.52	4.33	4.33	18.2	18.2	14.78	13	8.9	8.9	16.8	15.2	11	10.2	8.2	7.46	7.9	7.97	7.27	5.7	17.8	18.3	11.44	11.65	26.6	30.5
3	2	10	17.3	<5	4	3	33	32	6.04	6.04	6.38	6.38	15.1	15.1	13.2	13.2	5.39	5.359	15.59	13.9	9.14	10.16	7	7.72	6.36	7.6	6.18	7.73	19.5	17.4	10.17	9	33.1	29.7
3	2	11	16	<5	2	4	30	30	4.43	4.43	3.74	3.74	13.52	12.52	8.79	6	5.06	5.06	9.74	10.83	9.1	9.7	8.37	9.89	8.02	6.5	7.19	6.4	15.8	17.3	8.46	9.34	23.1	25.8
3	1	11	14.9	<5	2	4	32	32	5.49	5.45	4.51	4.51	11.7	11.7	12.76	12.76	4.61	5.61	17.26	12.3	10.62	8.4	10.38	9.1	7.76	7.1	6.81	6.81	18.1	19.5	11.49	8.82	33	30
3	1	12	17.6	<5	2	4	32	32	6.36	6.36	6.98	6.7	18.87	18.9	7.97	8	2.3	1.3	13.22	14.6	10.72	9.8	7.41	9.1	6.12	8.44	4.83	4.83	23.7	20.4	7.88	9.07	34.9	30.2
3	2	13	16.7	<5	3	3	28	28	5.48	5.48	5.1	5.1	12.03	11.5	10.51	10.51	4.13	4.13	10.86	12.25	7.9	10.4	9.19	9.1	7.9	5.56	6.28	6.28	17.8	17.8	8.3	10.7	28.7	34.2
3	2	9	16.7	<5	2	3	33	34	4.95	4.85	5.34	5.34	18.1	18.1	13.13	12	4.05	4.3	11.98	13.4	10.82	7.8	9.33	8.45	8.43	8.43	7.72	7.82	19.3	19.3	8.1	7.56	30.7	24.8
3	1	14	16.9	<5	3	3	29	30	5.25	5.25	6.28	6.28	18.11	18.3	12.45	12.45	7.44	7.44	13.02	14.5	10.1	10.4	6.83	6.83	5.39	5.39	5.91	5.91	16	16	9.61	10.18	27.8	27.9
3	1	11	17.5	<5	3	3	32	33	5.3	5.1	5.19	5.19	15.53	15.53	11.95	11.8	5.18	5.18	13.66	14	10.35	10.5	7.53	7.53	6.62	6.62	6.1	6.1	18.06	18.06	9.04	11.28	29.1	28.7
3	2	13	17.4	<5	4	3	30	32	6.04	6.04	4.51	4.61	14.73	14.83	10.51	10.51	5.39	5.5	13.22	13.8	11.11	12.13	7.9	7.9	6.36	6.36	6.76	6.8	19.5	19.5	11.44	8.9	34.9	30.9
3	1	14	17.3	<5	4	4	33	34	4.43	4.43	6.98	6.98	17.2	17.2	13.13	13.23	5.06	5.06	10.86	11.61	11	11.34	8.2	9.2	8.02	8.2	7.27	7.27	15.8	15.8	10.17	11.23	24.6	26.1
3	1	10	16	<5	4	3	30	33	5.49	5.49	5.1	5.1	13.16	14.16	12.45	12.45	4.61	4.71	11.98	13.97	9.14	10.09	7	7	7.76	8.76	6.18	6.18	18.1	17.1	8.46	7.88	27.8	31.6
3	2	13	14.9	<5	2	4	32	30	6.36	6.2	5.34	5.34	15.64	15.54	12.22	12.4	4.13	4.23	13.02	14	9.1	10.2	8.37	8.37	6.12	6.12	7.19	7.2	23.7	23.7	11.49	10.15	28.1	27.8
3	1	12	17.6	<5	2	4	32	30	5.48	5.48	6.28	6.4	17.08	17.08	10.27	10.37	6.5	6.5	14.11	11.74	10.62	10.16	10.38	10.38	7.9	6.9	6.81	5.81	17.8	17.8	7.88	9.53	29.2	33.4
3	2	9	16.7	<5	2	4	28	30	4.95	4.95	4.33	4.33	17.36	17.34	13.13	13.23	7.44	7.5	12.4	15.26	10.72	9.7	7.41	8.41	8.43	8.43	4.83	4.83	19.3	18.3	8.3	10.3	29.2	32.01
3	2	9	16.7	<5	3	3	33	31	5.25	5.25	6.38	6.48	15.5	15.5	11.8	11.9	5.18	5.18	13.55	14.07	10	8.4	9.19	9.19	5.39	5.49	6.28	5.28	18.1	18.1	8.1	8.1	29.5	28.4
3	2	10	16.9	<5	2	3	29	30	5.4	5.4	3.74	3.74	15.6	14	11.6	11.6	5.3	5.4	13.7	14	10.82	9.8	9.33	10.33	6.7	6.7	7.72	7.72	18.2	19.2	9.61	9.61	27.7	30.1
